# Supplementary material for: Palladium nanoparticles loaded on nitrogen and boron dual-doped single-wall carbon nanohorns with high electrocatalytic activity in the oxygen reduction reaction
Source: Royal Society of Chemistry journal article supplement (doi:10.1039/c8ra07248e), 2018-01-01
Supplement: c8ra07248e1.pdf [file c8ra07248e1.pdf]

## Palladium nanoparticles loaded on loaded on nitrogen and boron dual-doped single-wall carbon nanohorns with high electrocatalytic activity in oxygen reduction reaction

Xueyou Tan,<sup>a</sup> Jinxuan Zhang,<sup>b</sup> Xiaohui Wu,<sup>a</sup> Yuanyuan Wang,<sup>a</sup> Meixian Li,<sup>b</sup> and Zujin Shi<sup>\*a</sup>

<sup>a</sup> Beijing National Laboratory for Molecular Sciences, State Key Lab of Rare Earth Materials Chemistry and Applications, College of Chemistry and Molecular Engineering, Peking University, Beijing 100871, P. R. China. E-mail: zjshi@pku.edu.cn

<sup>b</sup> Beijing National Laboratory for Molecular Sciences, College of Chemistry and Molecular Engineering, Peking University, Beijing 100871, P. R. China.

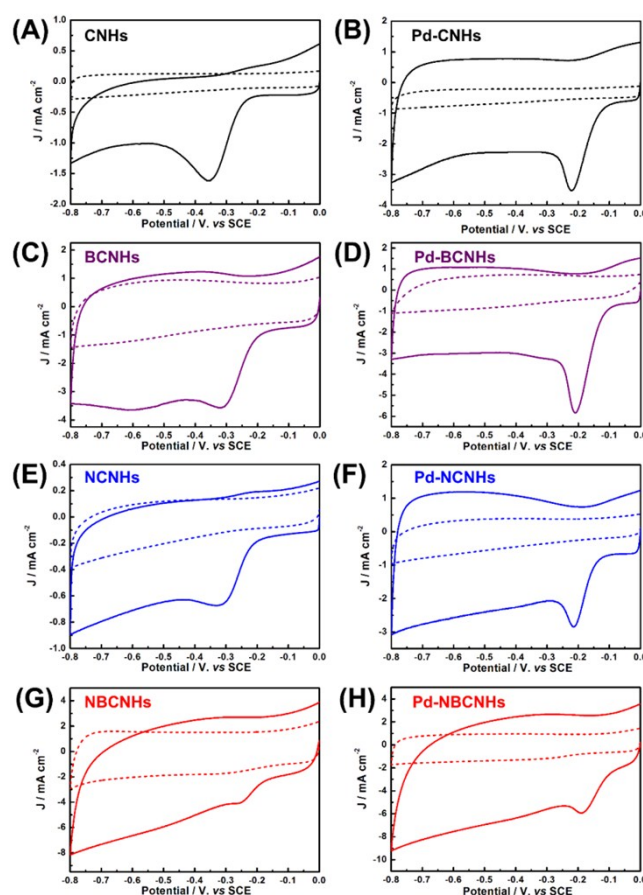

**Fig. S1** CV curves of (A) CNHs, (B) Pd-CNHs, (C) BCNHs, (D) Pd-BCNHs, (E) NCNHs, (F) Pd-NCNHs, (G) NBCNHs and (H) Pd-NBCNHs at a scan rate of 50 mV s<sup>-1</sup> in O<sub>2</sub>-saturated (solid line) or N<sub>2</sub>-saturated (dash line) 0.1 M KOH solution.
